# Supplementary material
Source: Springer Nature journal article supplement (https://www.springermedizin.de/resource/supplementary/12891_2011_1247_MOESM1_ESM.pdf/9507456)
Supplement: MOESM1 [file 9507456]

General population (Subject accepting or refusing interview, for whom at least one data item is available)  
N=3326

Population responding to LFES-SQ questionnaire  
N=3081

Subject without potential fibromyalgia  
N=2849 (92.5%)

Subjects with potential or established fibromyalgia  
N=232 (7.5%)

Subjects refusing consultation  
not returning the patient questionnaire  
N=87 (37.5%)

Subjects completing patient questionnaire  
N=49 (21.1%) (CS-)

Patients attending consultation with Rheumatologist  
N=96 (41.4%) (CS+)

Patients with invalidated diagnosis  
N=76 (79.2%) (FM-)

Patients with confirmed diagnosis  
N=20 (20.8%) (FM+)
